# Supplementary material for: Effect of in vitro growth on mouse oocyte competency, mitochondria and transcriptome
Source: PubMed Central journal article supplement (PMC8494378; doi:10.1530/rep-21-0209), 2021-08-12
Supplement: supplementary_figure_2.pdf [file supplementary_figure_2.pdf]

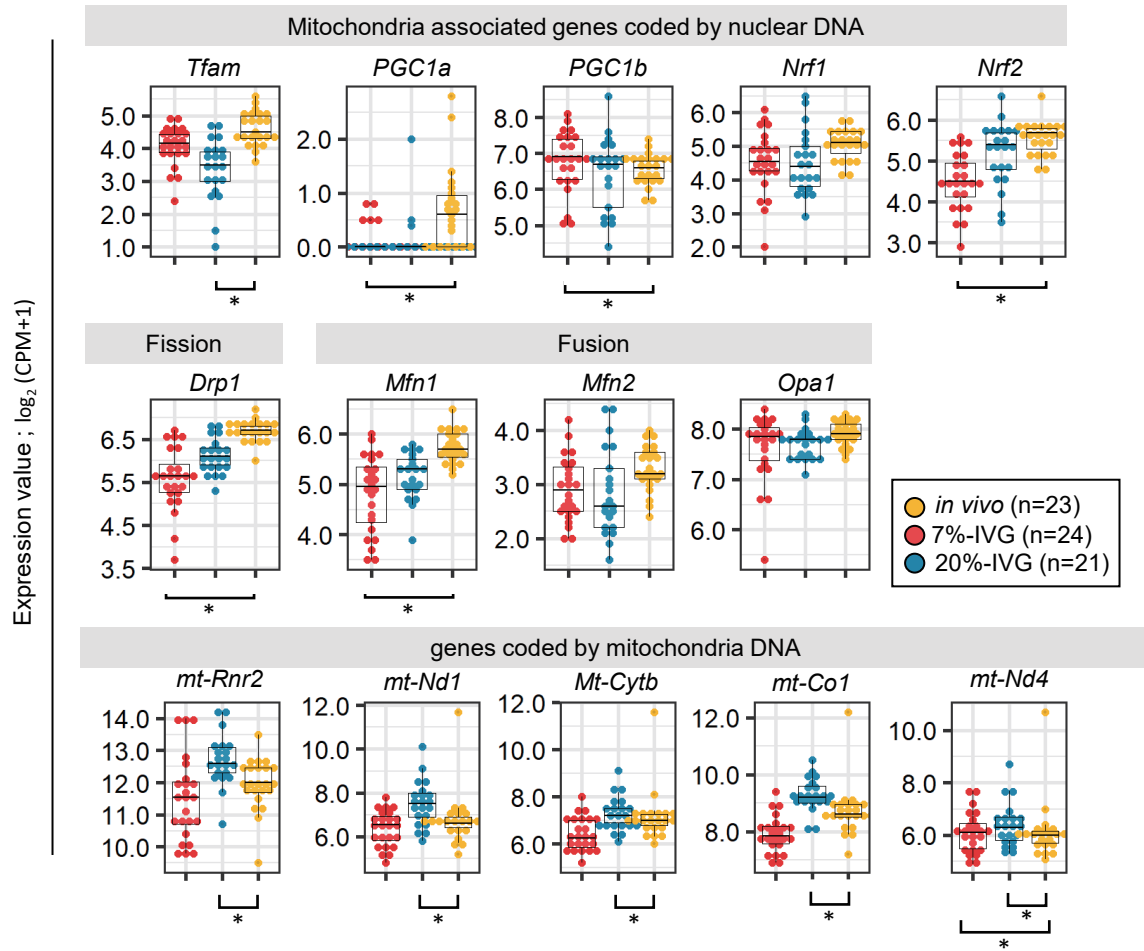

**Figure S2 Expression of mitochondria-associated genes**

Expression of mitochondria-associated genes in *in vivo*-grown oocytes (yellow), 20%-IVG oocytes (blue), and 7%-IVG oocytes (red). Vertical axis indicates  $\log_2(\text{CPM}+1)$ . Asterisks indicate significant difference ( $\text{padj} < 0.05$ ).
